# Supplementary material for: Transcription Factor SiDi19-3 Enhances Salt Tolerance of Foxtail Millet and Arabidopsis
Source: MDPI journal article supplement (doi:10.3390/ijms24032592), 2023-01-30
Supplement: s1 [file s1]

Supplemental Table S1: Identification of *Di19* genes from foxtail millet

| Gene Name       | Gene ID          | Chr. | Number of<br>amino acids | Molecular<br>weight | <i>PI</i> |
|-----------------|------------------|------|--------------------------|---------------------|-----------|
| <i>SiDi19-1</i> | Seita.1G137300.1 | 1    | 237aa                    | 26831.81            | 6.49      |
| <i>SiDi19-2</i> | Seita.3G147600.1 | 3    | 225aa                    | 25180.17            | 5.56      |
| <i>SiDi19-3</i> | Seita.3G274200.1 | 3    | 236aa                    | 25737.64            | 5.23      |
| <i>SiDi19-4</i> | Seita.3G337800.1 | 3    | 219aa                    | 24256.09            | 4.51      |
| <i>SiDi19-5</i> | Seita.5G266000.1 | 5    | 245aa                    | 27310.45            | 4.95      |
| <i>SiDi19-6</i> | Seita.5G467500.1 | 5    | 208aa                    | 23657.62            | 5.58      |
