# Supplementary material for: Transcription Factor SiDi19-3 Enhances Salt Tolerance of Foxtail Millet and Arabidopsis
Source: MDPI journal article supplement (doi:10.3390/ijms24032592), 2023-01-30
Supplement: s1 [file s1]

Supplemental Table S2: Analysis of various response elements in promoter regions.

| Name          | ABRE | TGA | ERE | MBS/DRE | GT1/SRE | LTR | HSE | TCA/SARE | JARE | WRE |
|---------------|------|-----|-----|---------|---------|-----|-----|----------|------|-----|
| <i>Di19-1</i> | 4    | 1   | 0   | 1       | 0       | 0   | 0   | 3        | 0    | 4   |
| <i>Di19-2</i> | 8    | 1   | 3   | 6       | 0       | 1   | 0   | 0        | 0    | 0   |
| <i>Di19-3</i> | 4    | 1   | 2   | 0       | 0       | 1   | 0   | 1        | 0    | 2   |
| <i>Di19-4</i> | 3    | 0   | 0   | 1       | 0       | 2   | 0   | 0        | 0    | 1   |
| <i>Di19-5</i> | 2    | 1   | 0   | 0       | 0       | 2   | 0   | 0        | 0    | 2   |
| <i>Di19-6</i> | 2    | 0   | 0   | 3       | 1       | 0   | 0   | 0        | 0    | 1   |
